# Supplementary material
Source: Springer Nature journal article supplement (https://www.springermedizin.de/resource/supplementary/13054_2004_3682_MOESM4_ESM.pdf/9721044)

Figure 5.

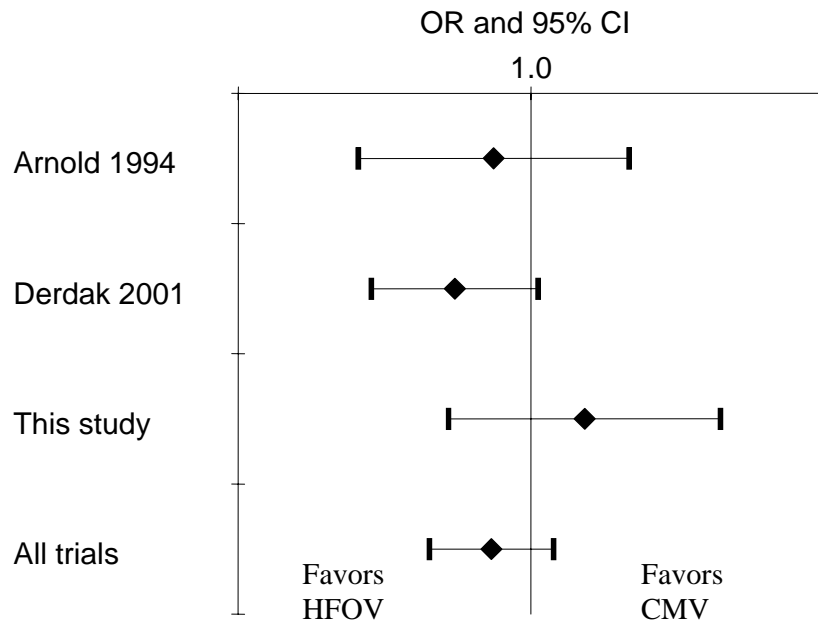

Supplement: MOESM4 [file 9721044]
